# Supplementary material for: Ion- and air-tailored micro-honeycomb structures for superior Na-ion storage in coir-derived hard carbon
Source: Royal Society of Chemistry journal article supplement (doi:10.1039/c9nj01397k), 2019-01-01
Supplement: c9nj01397k1.pdf [file c9nj01397k1.pdf]

## New Journal of Chemistry

### Ion and Air tailored Micro-honeycomb Structure for Superior Na-ion Storage in Coir Derived Hard Carbon

Danting Li<sup>a</sup>, Yi Zhu<sup>a</sup>, Enze Xu<sup>a</sup>, Hui Wang<sup>a</sup>, Taotao Chen<sup>a</sup>, Junjie Quan<sup>a</sup>, Yan Zhang<sup>a</sup>,  
Li Wang<sup>b\*</sup>, Yang Jiang<sup>a\*</sup>

<sup>a</sup>School of Materials Science and Engineering, Hefei University of Technology,  
Hefei, Anhui 230009, P. R. China

<sup>b</sup>School of Chemistry and Chemical Engineering, Hefei University of Technology,  
Hefei, Anhui 230009, P. R. China.

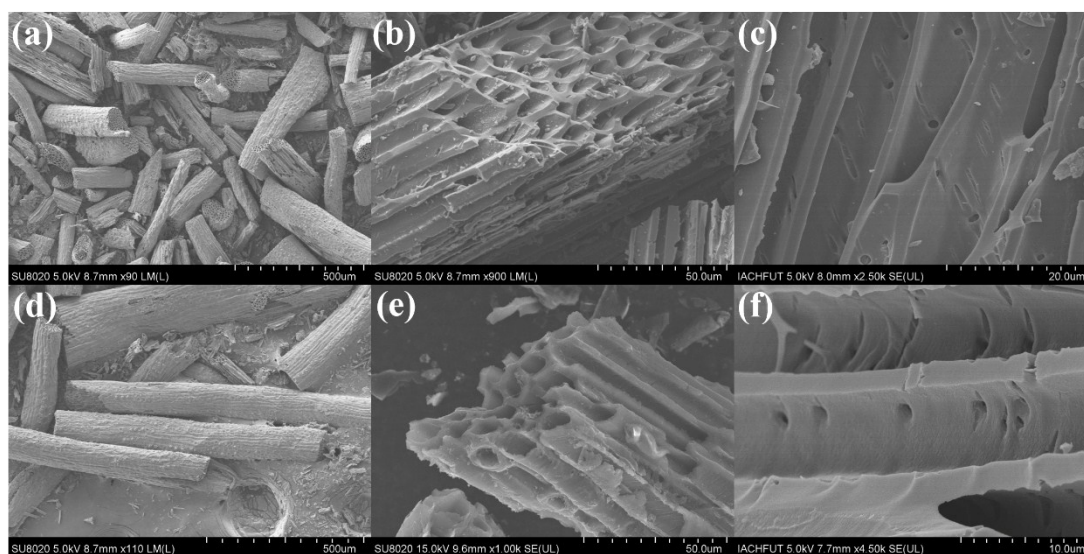

**Figure S1.** FESEM images of (a, b and c) ion activated and (d, e and f) air activated coir carbon.

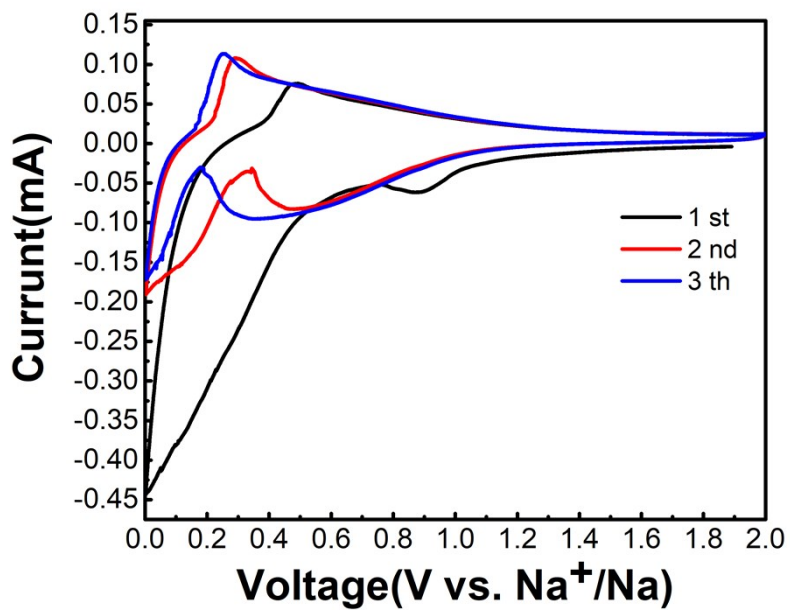

**Figure S2.** Cyclic voltammetry (CV) curves of CCI-800

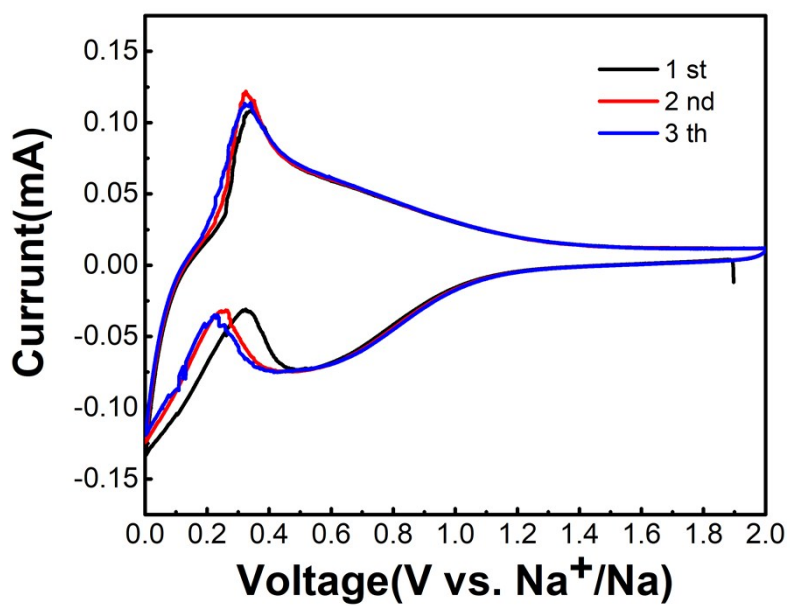

**Figure S3.** Cyclic voltammetry (CV) curves of CCI-1000

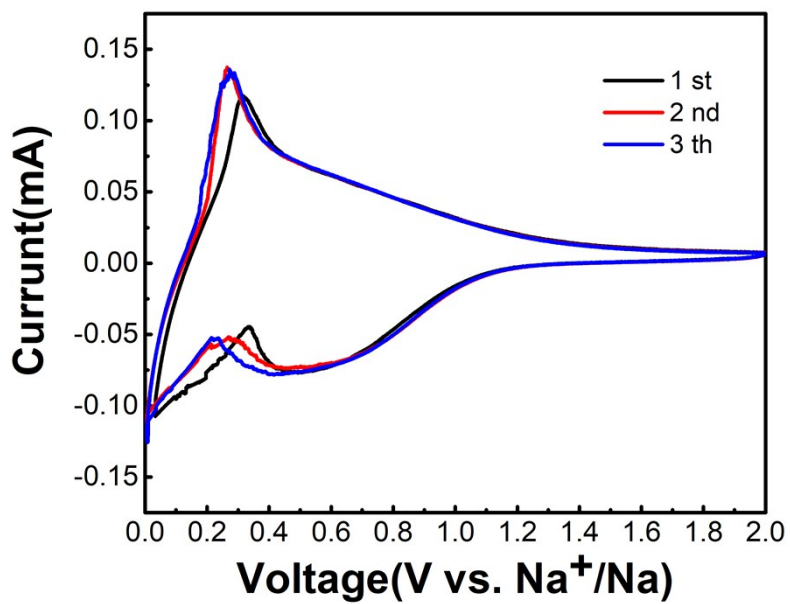

**Figure S4.** Cyclic voltammetry (CV) curves of CCI-1200

**Table S1** Comparison of electrochemical performance for the representative biomass carbon anodes in SIBs from this work and previous reports

| <b>Materials description</b>      | <b>Cycling data*</b>             | <b>Rate performances**</b> | <b>Ref.</b> |
|-----------------------------------|----------------------------------|----------------------------|-------------|
| Cotton derived carbon             | 305/97%/30/100 <sup>th</sup>     | 275/150<br>180/300         | 1           |
| Sucrose derived carbon            | 290/93%/30/100 <sup>th</sup>     | 98/150                     | 2           |
| Macadamia shell derived carbon    | ~200/67%/30/800 <sup>th</sup>    | 249/300                    | 3           |
| Coconut oil derived carbon        | 203 /73%/100/50 <sup>th</sup>    | 107 /400<br>78/1000        | 4           |
| Apple derived carbon              | 85/100%/1000/1000 <sup>th</sup>  | 155/400<br>86/2000         | 5           |
| Pomelo peels derived carbon       | 181/84.6%/200/220 <sup>th</sup>  | 182.3/500<br>71/5000       | 6           |
| Sorghum stalk derived carbon      | 245/84%/20/50 <sup>th</sup>      | 212/100<br>172/200         | 7           |
| Orange peel derived carbon        | 117/100%/1000/1000 <sup>th</sup> | 125/1000                   | 8           |
| Eggshell membranes derived carbon | 246/~99%/50/200 <sup>th</sup>    | 110/500<br>77/1000         | 9           |
| Butterfly wings derived carbon    | 125/~99%/250/400 <sup>th</sup>   | 210/50<br>90/1000          | 10          |
| Coir derived carbon               | 168/~93%/500/500 <sup>th</sup>   | 408/20<br>152/1000         | This work   |

\*) : Capacity [mA h g<sup>-1</sup>]/ Capacity retention/Current Density[mA g<sup>-1</sup>]/Cycles;  
 \*\*): Capacity [mA h g<sup>-1</sup>]/Current Density [mA g<sup>-1</sup>];

## References

- [1]. Y. Li, Y.-S. Hu, M.-M. Titirici, L. Chen and X. Huang, *Advanced Energy Materials*, 2016, 6, 1600659.
- [2]. Y. Li, S. Xu, X. Wu, J. Yu, Y. Wang, Y.-S. Hu, H. Li, L. Chen and X. Huang, *Journal of Materials Chemistry A*, 2015, 3, 71-77.
- [3]. Y. Zheng, Y. Wang, Y. Lu, Y.-S. Hu and J. Li, *Nano Energy*, 2017, 39, 489-498.
- [4]. R. R. Gaddam, D. Yang, R. Narayan, K. Raju, N. A. Kumar and X. S. Zhao, *Nano Energy*, 2016, 26, 346-352.
- [5]. L. Wu, D. Buchholz, C. Vaalma, G. A. Giffin and S. Passerini, *Chem Electro Chem*, 2016, 3, 292-298.
- [6]. K. Hong, L. Qie, R. Zeng, Z.-q. Yi, W. Zhang, D. Wang, W. Yin, C. Wu, Q.-j. Fan, W.-x. Zhang and Y.-h. Huang, *Journal of Materials Chemistry A*, 2014, 2, 12733.
- [7]. X. Zhu, X. Jiang, X. Liu, L. Xiao and Y. Cao, *Green Energy & Environment*, 2017, 2, 310-315.
- [8]. J. Xiang, W. Lv, C. Mu, J. Zhao and B. Wang, *Journal of Alloys and Compounds*, 2017, 701, 870-874.
- [9]. X. Li, J. Liang, Z. Hou, Y. Zhu and Y. Qian, *RSC Adv.*, 2014, 4, 50950-50954.
- [10]. W. Lv, J. Zhao, F. Wen, J. Xiang, L. Li, L. Wang, Z. Liu and Y. Tian, *Journal of Materials Chemistry A*, 2015, 3, 13786-13793.
